# Supplementary material for: The Lipid Handling Capacity of Subcutaneous Fat Is Programmed by mTORC2 during Development
Source: PubMed Central journal article supplement — Cell Rep. Author manuscript; Available in PMC 2020 Nov 3. (PMC7607535; doi:10.1016/j.celrep.2020.108223), 2020-10-06
Supplement: NIHMS1635591-supplement-1.pdf [file NIHMS1635591-supplement-1.pdf]

**Cell Reports, Volume 33**

## **Supplemental Information**

### **The Lipid Handling Capacity of Subcutaneous Fat Is Programmed by mTORC2 during Development**

**Wen-Yu Hsiao, Su Myung Jung, Yuefeng Tang, John A. Haley, Rui Li, Huawei Li, Camila Martinez Calejman, Joan Sanchez-Gurmaches, Chien-Min Hung, Amelia K. Luciano, Victoria DeMambro, Kathryn E. Wellen, Clifford J. Rosen, Lihua Julie Zhu, and David A. Guertin**

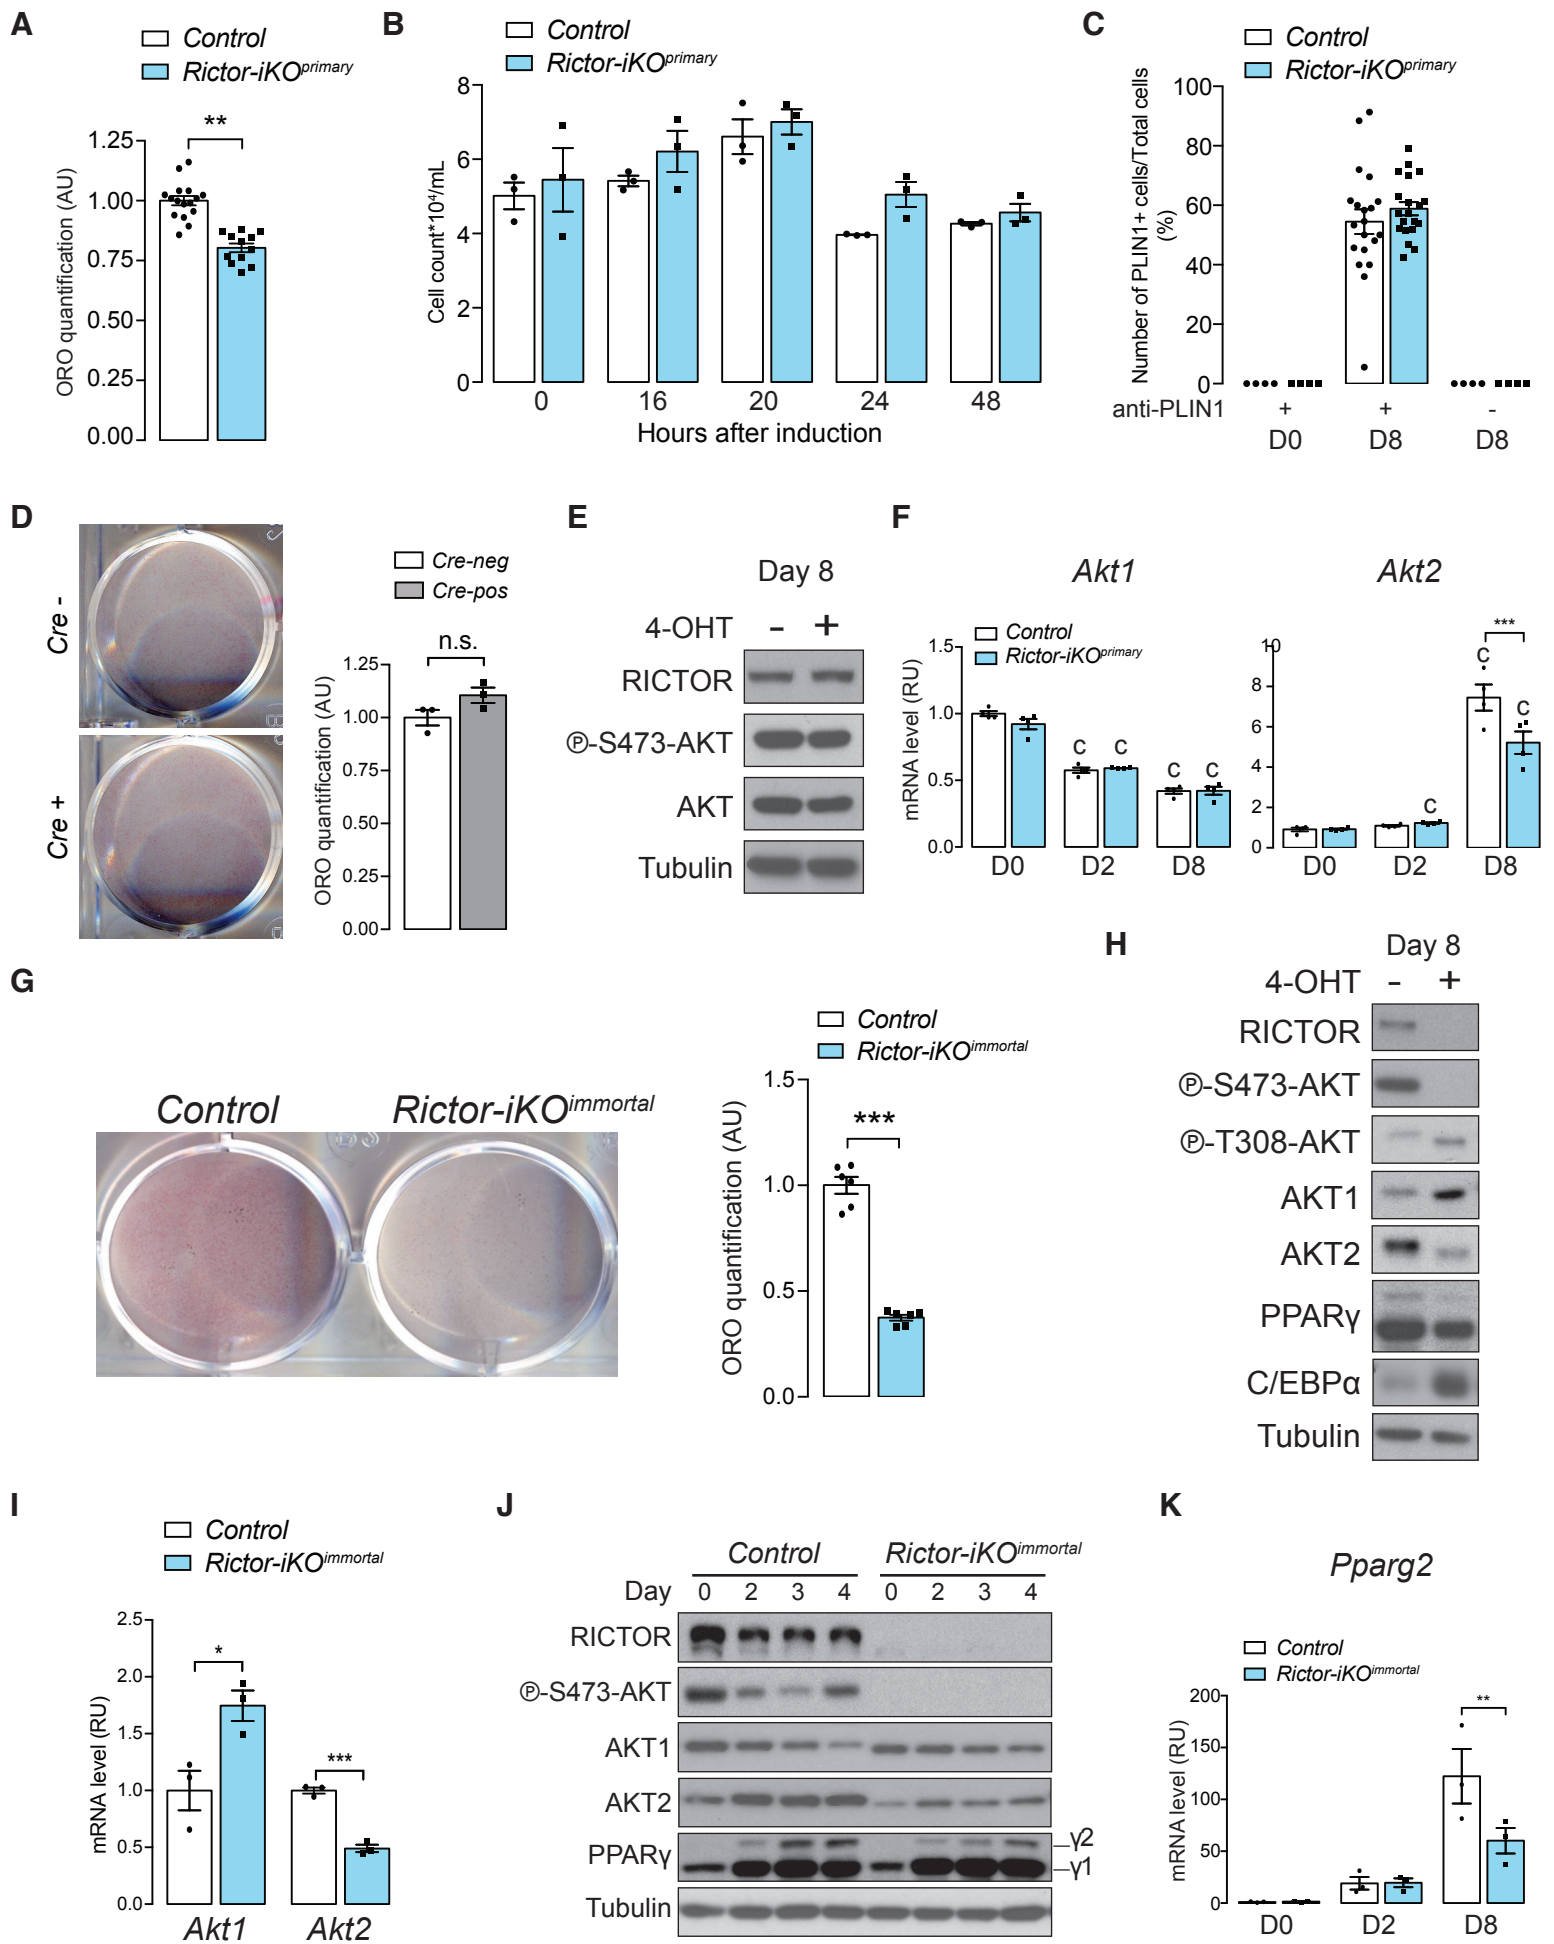

**Figure S1, related to Figure 1.**

**A** Quantification (quant) of the Oil Red O (ORO) staining of differentiated control (EtOH) and *Rictor-iKO<sub>primary</sub>* (4-OHT) cells after isopropanol extraction and direct ORO content measurement (data represent mean  $\pm$  SEM; \*\*p < 0.01). See also **Figure 1B**.

**B** Cell number quantification of control and *Rictor-iKO<sub>primary</sub>* cells at indicated time points during the first 48 hours of differentiation (data represent mean  $\pm$  SEM).

**C** Percentage of Perilipin 1-positive (PLIN1+) cells per image taken from the immunofluorescence staining in **Figure 1C** (data represent mean  $\pm$  SEM).

**D** ORO staining of differentiated primary *preadipocytes isolated from a UBC-CreERT2* mouse. *Right panel:* quantification (quant) of the Oil Red O (ORO) staining. (data represent mean  $\pm$  SEM; \*\*p < 0.01). Cre-: cells treated with EtOH (without Cre). Cre+: cells treated with 4-OHT (with Cre expression). n.s.: not significant.

**E** Western blot of lysates from differentiated (Day 8) *UBC-CreERT2* cells with (4-OHT-treated) or without (EtOH-treated) Cre expression.

**F** Relative mRNA expression by RT-PCR of *Akt* isoforms in control and *Rictor-iKO<sub>primary</sub>* cells at the indicated differentiation days (data represent mean  $\pm$  SEM; \*\*\*p < 0.001; c: \*\*\*p < 0.001 when compared to D0 cells).

**G** ORO staining of differentiated control and *Rictor-iKO<sub>immortal</sub>* cells. *right panel:* Quantification of the ORO staining of differentiated control and *Rictor-iKO<sub>immortal</sub>* cells after isopropanol extraction and direct ORO content measurement (data represent mean  $\pm$  SEM; \*\*\*p < 0.001).

**H** Western blot of lysates from differentiated (Day 8) control and *Rictor-iKO<sub>immortal</sub>* cells.

**I** Relative mRNA expression by RT-PCR of *Akt* isoforms in differentiated control and *Rictor-iKO<sub>immortal</sub>* cells (data represent mean  $\pm$  SEM; \*p < 0.05, \*\*\*p < 0.001).

**J** Western blot of lysates from control and *Rictor-iKO<sub>immortal</sub>* cells at early differentiation time points (day 0 through day 4).  $\gamma$ 1: PPAR $\gamma$ 1 isoform;  $\gamma$ 2: PPAR $\gamma$ 2.

**K** Relative mRNA expression by RT-PCR of *Akt* isoforms in control and *Rictor-iKO<sub>immortal</sub>* cells at indicated differentiation days (data represent mean  $\pm$  SEM; \*\*p < 0.01).

**A**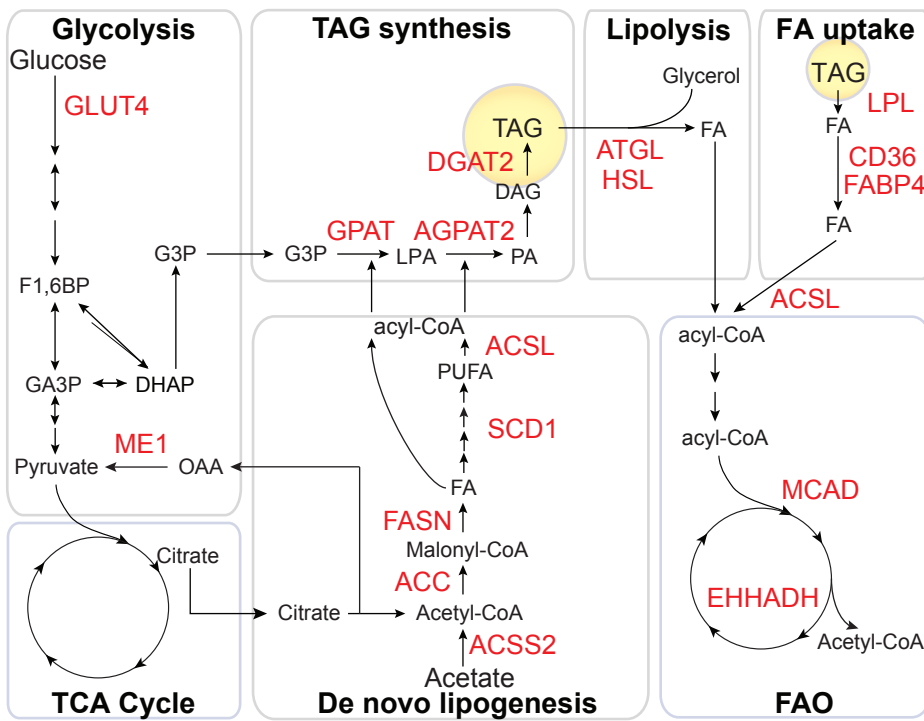**B**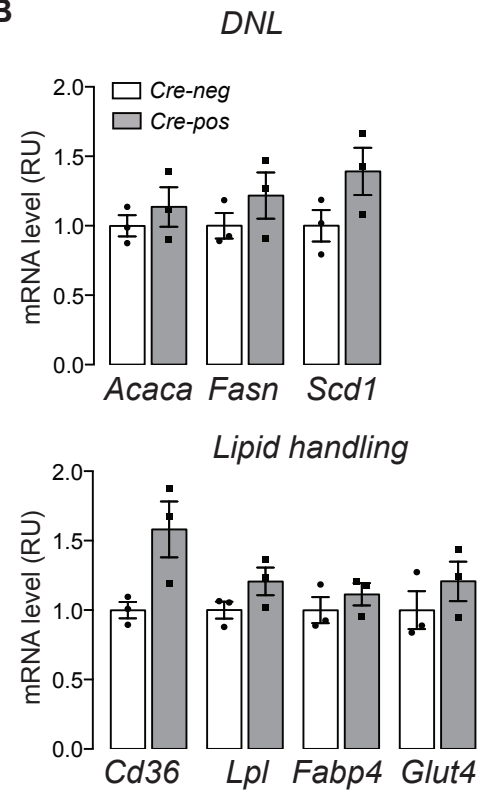**C**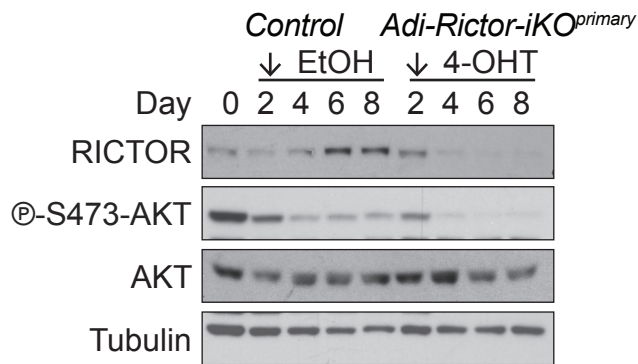**D**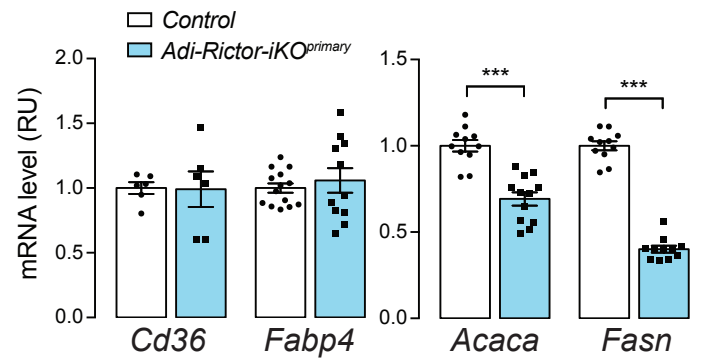**E**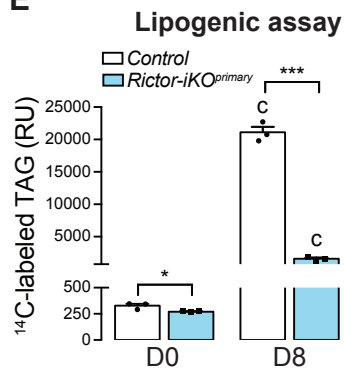**F**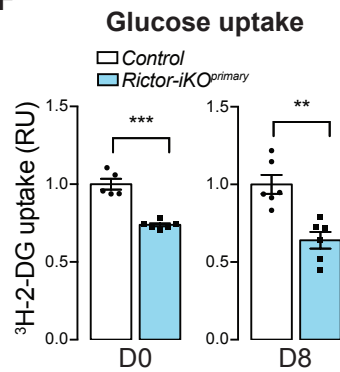**G**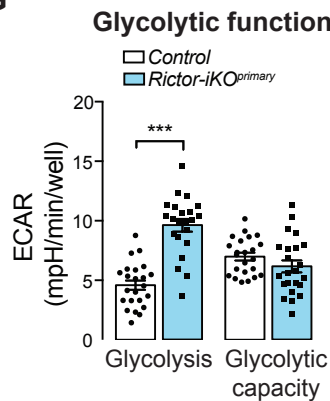**H**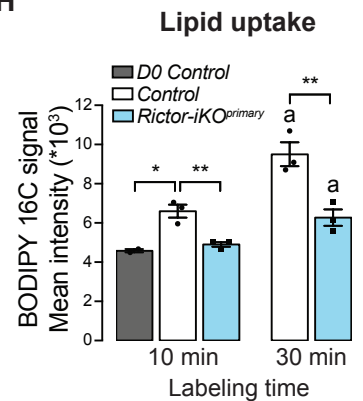

**Figure S2, related to Figure 2.**

**A** Pathway clusters of the *Rictor*-required adipogenic genes modified by KEGG pathway analysis. Genes highlighted in red: down-regulatory genes identified as PPAR $\gamma$ /ChREBP/SREBP1 targets. Also see **Figure 2C**. FAO: fatty acid oxidation, TCA cycle: tricarboxylic acid cycle; Abbreviations of metabolites: F1,6BP: fructose-1,6-bisphosphate, GA3P: glyceraldehyde 3-phosphate, DHAP: dihydroxyacetone phosphate, LPA: lysophosphatidic, PA: phosphatidic acid, DAG: diacylglycerol, TAG: triacylglycerol, FA: fatty acid, PUFA: polyunsaturated fatty acid. Abbreviations of gene names: GLUT4: Glucose transporter type 4, ME1: Malic enzyme 1, GPAT: Glycerol-3-phosphate acyltransferase, AGPAT2: 1-acylglycerol-3-phosphate O-acyltransferase 2, DGAT2: Diacylglycerol O-acyltransferase 1, ACSS2: Acyl-CoA Synthetase Short Chain Family Member 2, ACC: Acetyl-CoA carboxylase, FASN: Fatty acid synthase, SCD1: Stearoyl-CoA desaturase 1, ACSL: Acyl-CoA synthetase long-chain, HSL: Hormone-sensitive lipase. ATGL: Adipose triglyceride lipase, LPL: Lipoprotein lipase, FABP4: Fatty acid binding protein 4, MCAD: Medium-chain acyl-CoA dehydrogenase, EHHADH: Enoyl-CoA hydratase and 3-hydroxyacyl-CoA dehydrogenase.

**B** Relative mRNA expression by RT-PCR of genes in the DNL and lipid handling pathways in differentiated primary *UBC-CreERT2* cells with (Cre-pos, 4-OHT-treated) or without (Cre-neg, EtOH-treated) Cre expression (data represent mean  $\pm$  SEM). See also **Figure 1A**.

**C** Western blot of lysates from control and *Rictor-iKO<sub>primary</sub>* cells with *Rictor* deleted from D2 (*Adi-Rictor-iKO<sub>primary</sub>*) at indicated differentiation time points. Arrow: Starting point of 4-OHT exposure.

**D** Relative mRNA expression by RT-PCR of genes in the dnl and lipid handling pathways in control and *Adi-Rictor-iKO<sub>primary</sub>* cells. Data represent mean  $\pm$  SEM; \*\*\*p < 0.001.

**E** Lipogenic assay measured by <sup>14</sup>C-glucose incorporation into <sup>14</sup>C-TAG of undifferentiated (D0) and differentiated (D8) control and *Rictor-iKO<sub>primary</sub>* cells. Data represent mean  $\pm$  SEM; \*p < 0.05, \*\*\*p < 0.001. c: p < 0.001 relative to its D0 counterpart. RU: relative unit (calculated from CPM per  $\mu$ g of protein).

**F** <sup>3</sup>H-2-deoxyglucose (<sup>3</sup>H-2-DG) uptake of undifferentiated (D0) and differentiated (D8) control and *Rictor-iKO<sub>primary</sub>* cells. Data represent mean  $\pm$  SEM; \*\*p < 0.01, \*\*\*p < 0.001. RU: relative unit (calculated from CPM per minute per  $\mu$ g of protein).

**G** Glycolytic function determined by extracellular acidification rate (ECAR) of differentiated control and *Rictor-iKO<sub>primary</sub>* cells. Data represent mean  $\pm$  SEM; \*\*\*p < 0.001.

**H** BODIPY FL C16 lipid uptake of undifferentiated (D0) and differentiated (D8) control and *Rictor-iKO<sub>primary</sub>* cells incubated in either 10 or 30 minutes. Mean intensity was determined by flow cytometry. Data represent mean  $\pm$  SEM; \*p < 0.05, \*\*p < 0.01. a: p < 0.05 when compared to its counterpart in 10-minute group.

**A**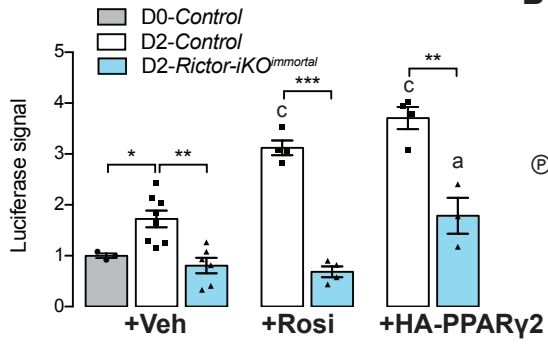**B**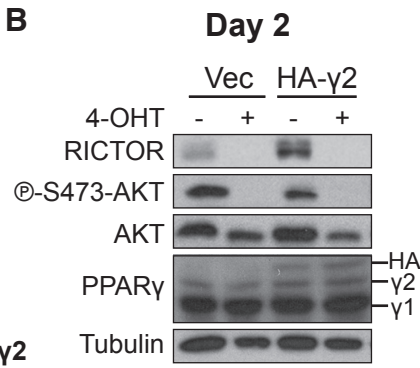**C**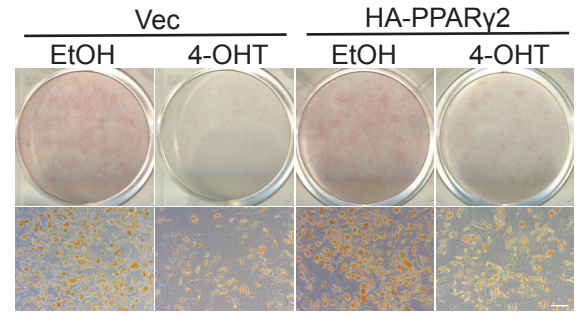**D**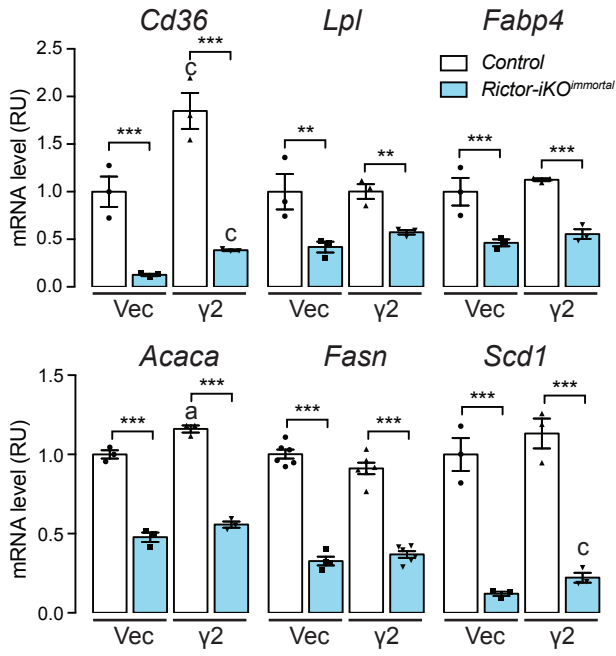**E**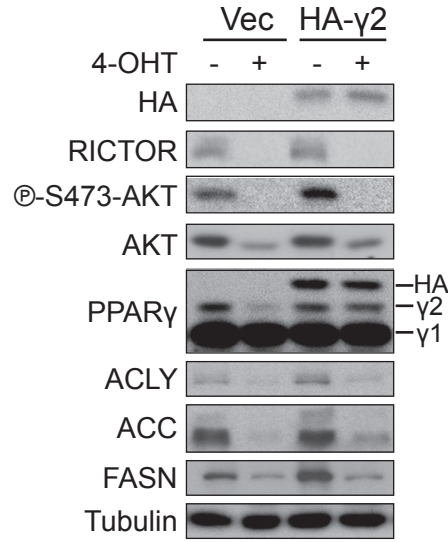**F**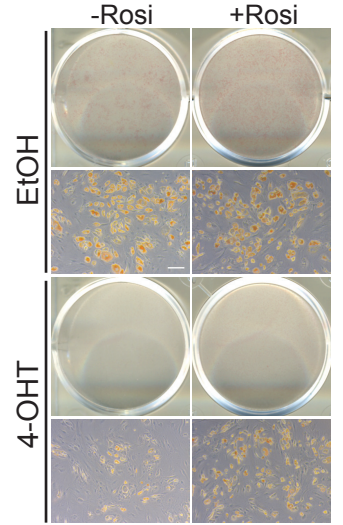**G**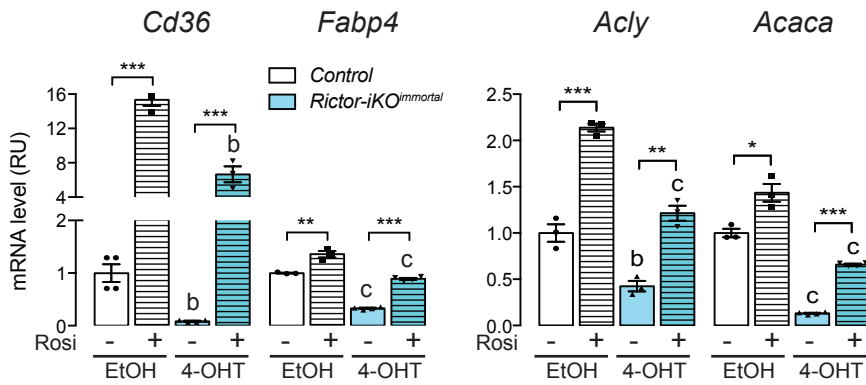**H**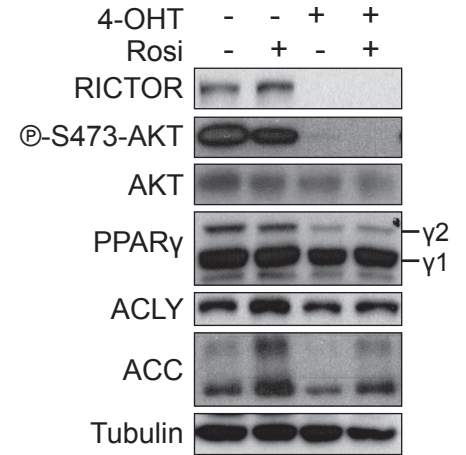

**Figure S3, related to Figure 3.**

**A** Luciferase reporter gene assay with PPRE-responsive element (PPRE-Luc) in control and *Rictor-iKO<sub>immortal</sub>* cells with indicated treatment or transduction at day 2. Rosi: Rosiglitazone (data represent mean  $\pm$  SEM; \*p < 0.05, \*\*p < 0.01, \*\*\*p < 0.001; a: \*p < 0.05 when compared to vehicle-treated cells; c: \*\*\*p < 0.001 when compared to vehicle-treated cells).

**B** Western blot of lysates from control and *Rictor-iKO<sub>immortal</sub>* at day 2. HA- $\gamma$ 2: cells transduced with HA-PPAR $\gamma$ 2.

**C** ORO staining of differentiated control and *Rictor-iKO<sub>immortal</sub>* cells overexpressing empty vector (Vec) or HA-PPAR $\gamma$ 2 plasmid (scale bar = 50  $\mu$ m).

**D** Relative mRNA expression of indicated genes from differentiated control and *Rictor-iKO<sub>immortal</sub>* cells overexpressing empty vector (vec) or HA-PPAR $\gamma$ 2 ( $\gamma$ 2) plasmid (data represent mean  $\pm$  SEM; \*\*p < 0.01, \*\*\*p < 0.001; a: \*p < 0.05 when compared to vector-expressing cells; c: \*\*\*p < 0.001 when compared to vector-expressing cells).

**E** Western blot of lysates from differentiated control and *Rictor-iKO<sub>immortal</sub>* cells overexpressing empty vector (Vec) or HA-PPAR $\gamma$ 2 (HA- $\gamma$ 2) plasmid.

**F** ORO staining of differentiated control and *Rictor-iKO<sub>immortal</sub>* cells (4-OHT-treated) with or without rosiglitazone (Rosi) supplement during differentiation (scale bar = 50  $\mu$ m).

**G** Relative mRNA expression of indicated genes from differentiated control and *Rictor-iKO<sub>immortal</sub>* cells (4-OHT-treated) with or without Rosiglitazone (Rosi) supplement (data represent mean  $\pm$  SEM; \*\*p < 0.01, \*\*\*p < 0.001; a: \*p < 0.05 when compared to its counterpart in non-Rosi group; b: \*\*p < 0.01; c: \*\*\*p < 0.001).

**H** Western blot of lysates from differentiated control and *Rictor-iKO<sub>immortal</sub>* cells with or without Rosiglitazone (Rosi) supplement.

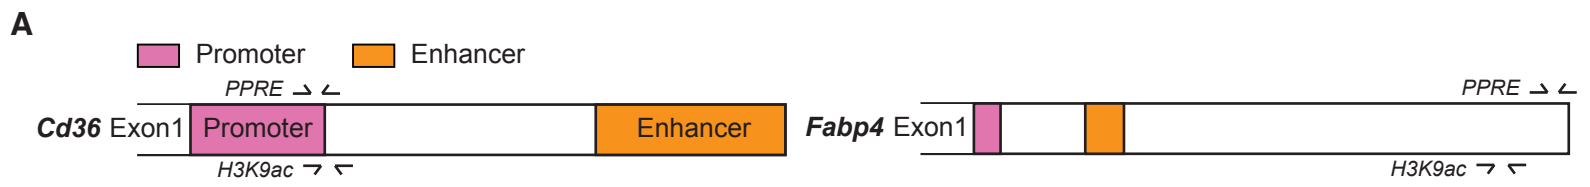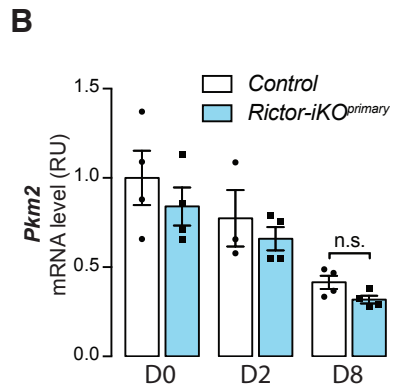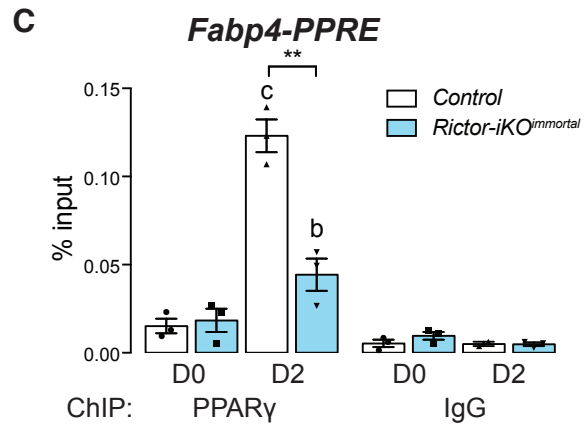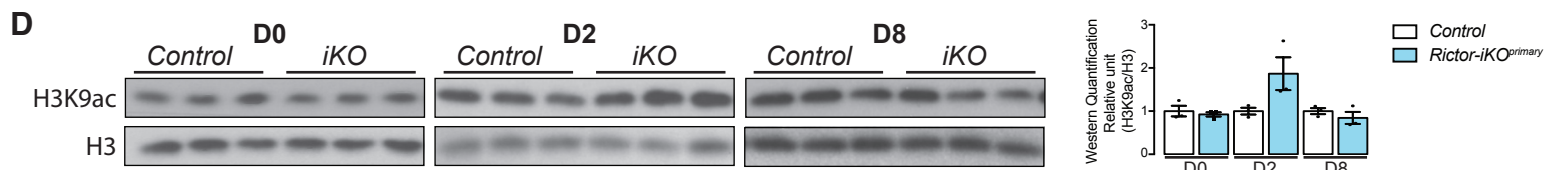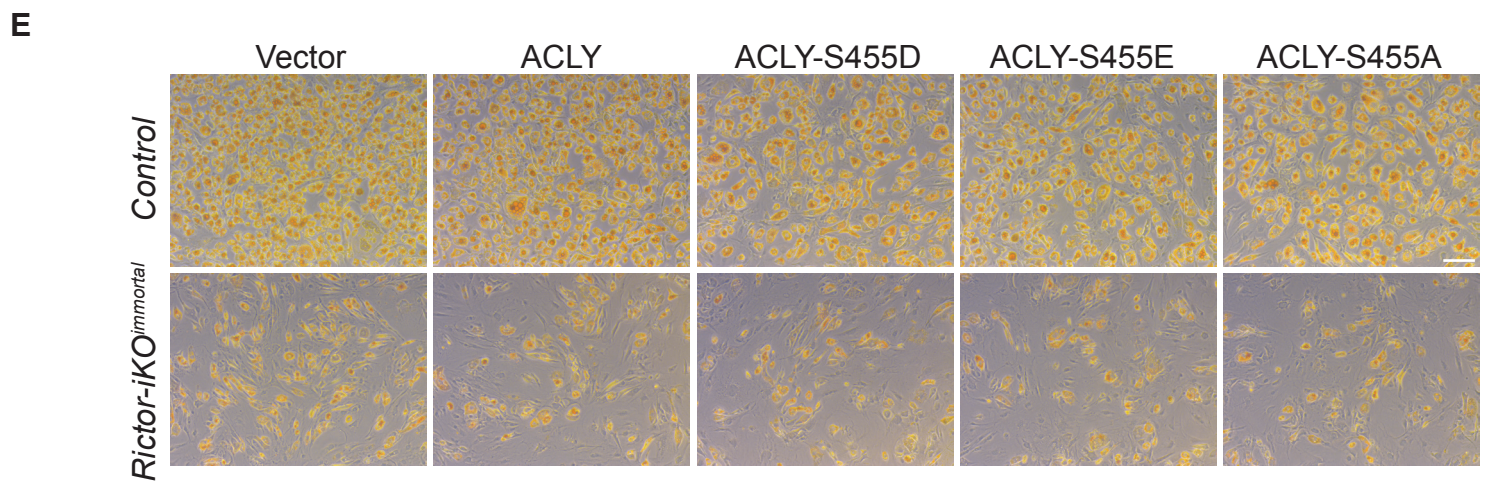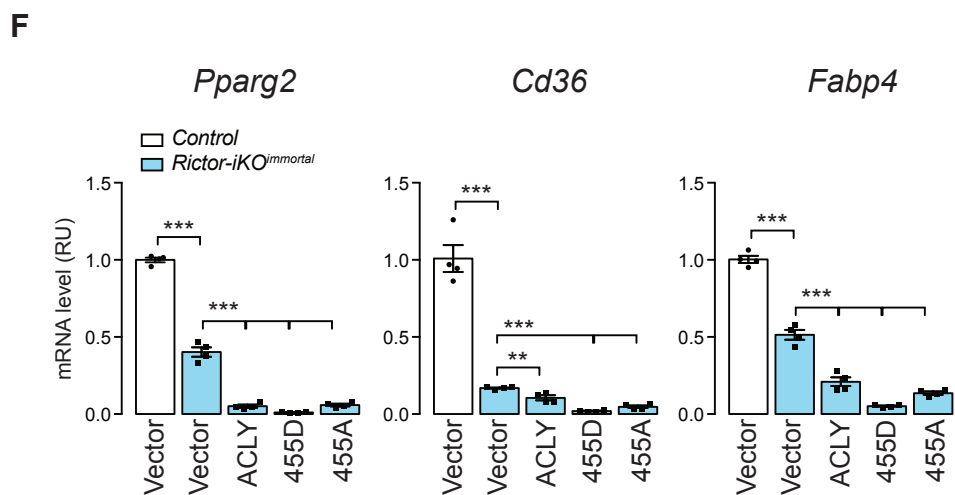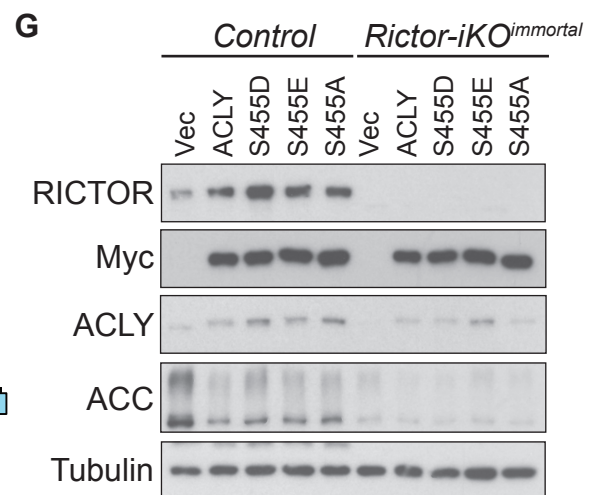



**Figure S4, related to Figure 3 and Figure 4.**

**A** Graphic showing the primer binding site (arrows) used in the ChIP assays relative to the promoter and enhancer regions of indicated genes.

**B** Relative mRNA expression of *Pkm2* in differentiated control and *Rictor-iKO<sub>primary</sub>* cells (data represent mean  $\pm$  SEM; n.s: not significant).

**C** PPAR $\gamma$ /PPAR-responsive element (PPRE) interaction and H3K9 acetylation (H3K9ac) identified by chromatin IP (ChIP) at *Fabp4* promoter in control and *Rictor-iKO<sub>immortal</sub>* cells (data represent mean  $\pm$  SEM; \*\*p < 0.01; b: \*\*p < 0.01 when compared to D0 cells; c: \*\*\*p < 0.001 when compared to D0 cells). ChIP with IgG were used as negative controls.

**D** Western blot of extracted histones from control and *Rictor-iKO<sub>primary</sub>* cells at indicated days during differentiation. Right panel: quantification of H3K9 acetylation signals compared to total H3 (data represent mean  $\pm$  SEM).

**E** Oil Red O (ORO) staining of differentiated control (EtOH) and *Rictor-iKO<sub>immortal</sub>* (4-OHT) cells overexpressing empty vector (Vec), Myc-ACLY, Myc-ACLY-S455D, Myc-ACLY-S455E, or Myc-ACLY-S455A (scale bar = 100  $\mu$ m).

**F** Relative mRNA expression by RT-PCR of indicated genes in differentiated control and *Rictor-iKO<sub>immortal</sub>* cells overexpressing empty vector (Vec), ACLY, ACLY-S455D, ACLY-S455E, or ACLY-S455A (data represent mean  $\pm$  SEM; \*\*p < 0.01, \*\*\*p < 0.001).

**G** Western blot of lysates from differentiated control and *Rictor-iKO<sub>immortal</sub>* cells overexpressing empty vector (Vec), ACLY or indicated ACLY mutants.

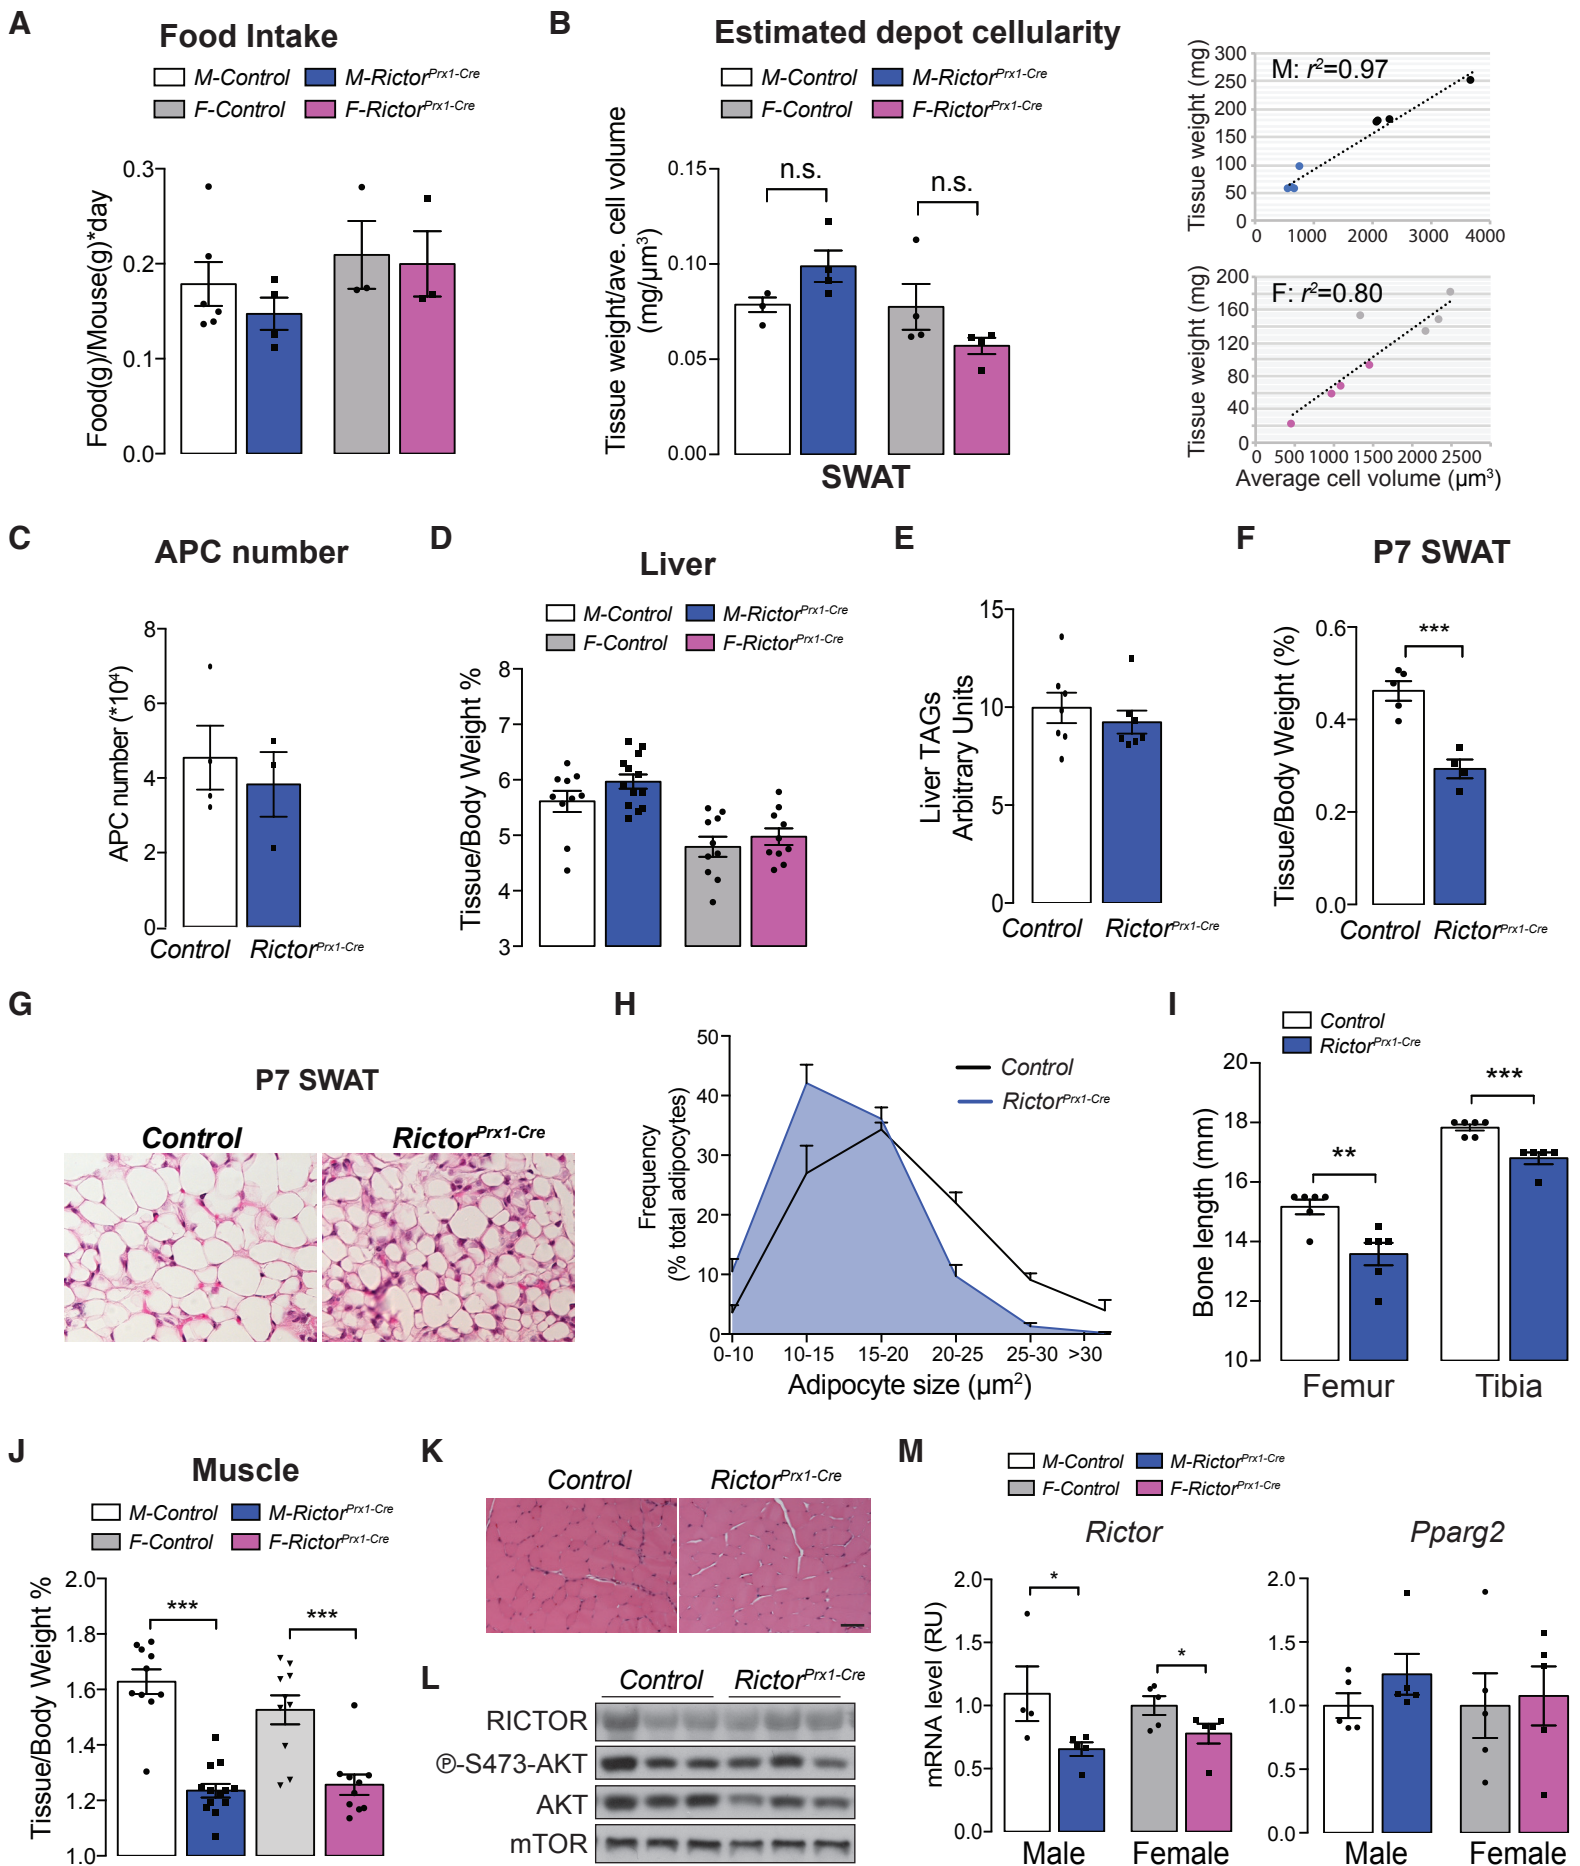

**Figure S5, related to Figure 6.**

- A** Food intake of control and *Rictor<sup>Prx1-Cre</sup>* mice at 8 weeks of age (N = 3-6; data represent mean  $\pm$  SEM).
- B** Estimated depot cellularity in SWAT from control and *Rictor<sup>Prx1-Cre</sup>* mice at 8 weeks of age (N = 4; data represent mean  $\pm$  SEM). *right panel*: linear correlation of tissue weight versus average cell volume.  $r^2$  = square of correlation. n.s.: not significant, M: male, F: female.
- C** Adipocyte precursor (APC) number isolated from SWAT using cell surface markers staining followed by FACS analysis (N= 4; data represent mean  $\pm$  SEM).
- D** Liver weight relative to body weight of control and *Rictor<sup>Prx1-Cre</sup>* mice at 8 weeks of age (N= 10-11; data represent mean  $\pm$  SEM).
- E** TAG content of livers from 8-week-old female mice. Data represent mean  $\pm$  SEM.
- F** SWAT weight relative to body weight of control and *Rictor<sup>Prx1-Cre</sup>* mice at postpartum day 7 (P7) (N =4; data represent mean  $\pm$  SEM; \*\*\*p < 0.001).
- G** H&E stains of adipose tissues from postpartum day 7 (P7) mice.
- H** Adipocyte size distribution in indicated depot (N = 4; more than 100 adipocytes were calculated from each mouse; data represent mean  $\pm$  SEM).
- I** Femur and Tibia length from 8-week-old male mice (N =6; data represent mean  $\pm$  SEM; \*\*p < 0.01, \*\*\*p < 0.001).
- J** Muscle (quadriceps) weight relative to body weight of control and *Rictor<sup>Prx1-Cre</sup>* mice at 8 weeks of age (N= 10-11; data represent mean  $\pm$  SEM; \*\*\*p < 0.001).
- K** H&E stains of muscles from 8-week-old mice (scale bar = 100  $\mu$ m).
- L** Western blot of lysates from muscles of control and *Rictor<sup>Prx1-Cre</sup>* mice.
- M** Relative mRNA expression by RT-PCR of *Rictor* and *Pparg2* in bone marrow adipose tissues isolated from control and *Rictor<sup>Prx1-Cre</sup>* mice (N= 4-5; data represent mean  $\pm$  SEM; \*p < 0.05).

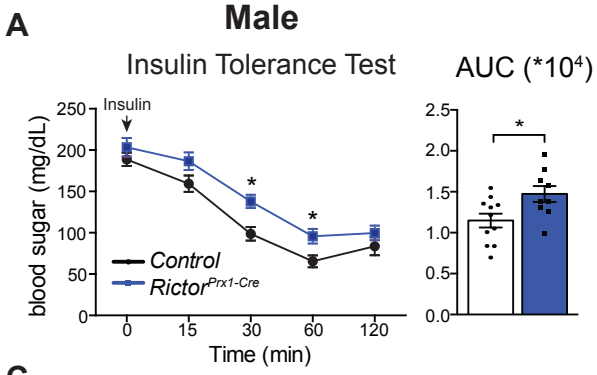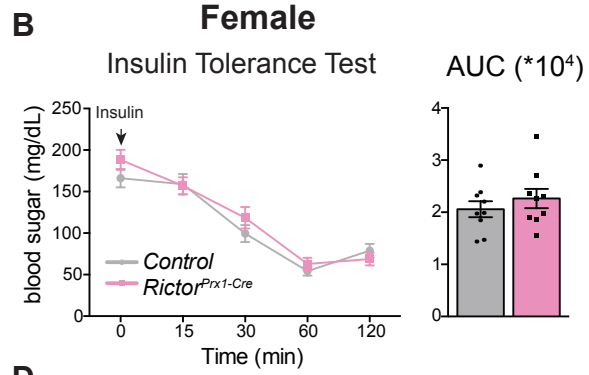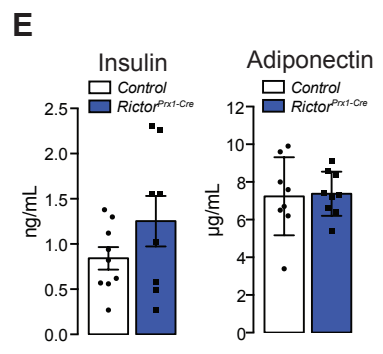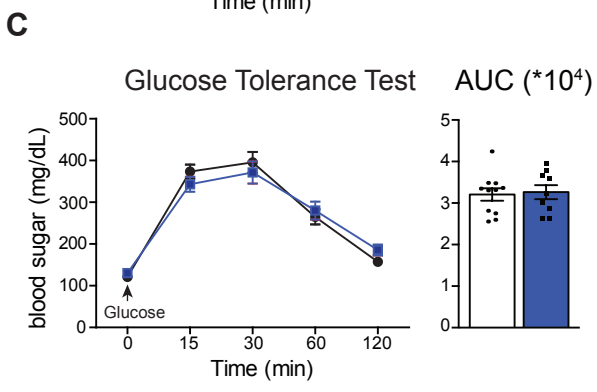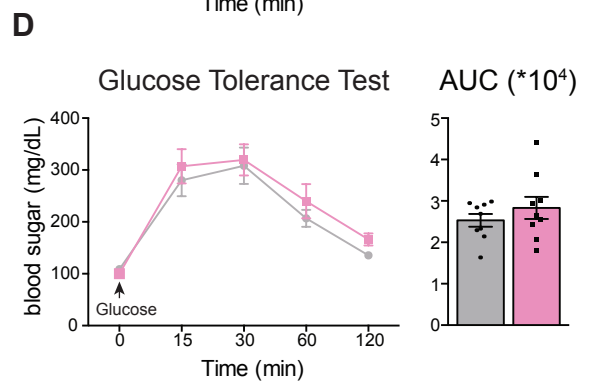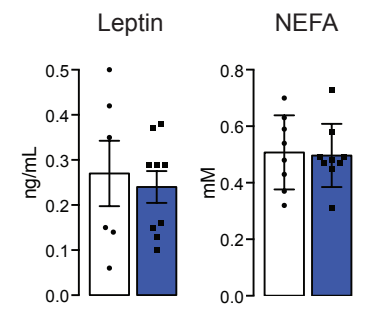

**Figure S6, related to Figure 6.**

**A-B** Insulin tolerance test (left) with area under curve (AUC, right) from 8-week-old male (**A**) and female (**B**) mice (n = 9-11; data represent mean  $\pm$  SEM; \*p < 0.05)

**C-D** Glucose tolerance test (left) with area under curve (AUC, right) from 8-week-old male (**C**) and female (**D**) mice (n = 9-11; data represent mean  $\pm$  SEM; \*p < 0.05)

**E** Plasma insulin, adiponectin, leptin, and non-esterified fatty acids (NEFA) levels ad libitum fed 8-week-old male mice (n = 7-9; bars represent mean  $\pm$  SEM).

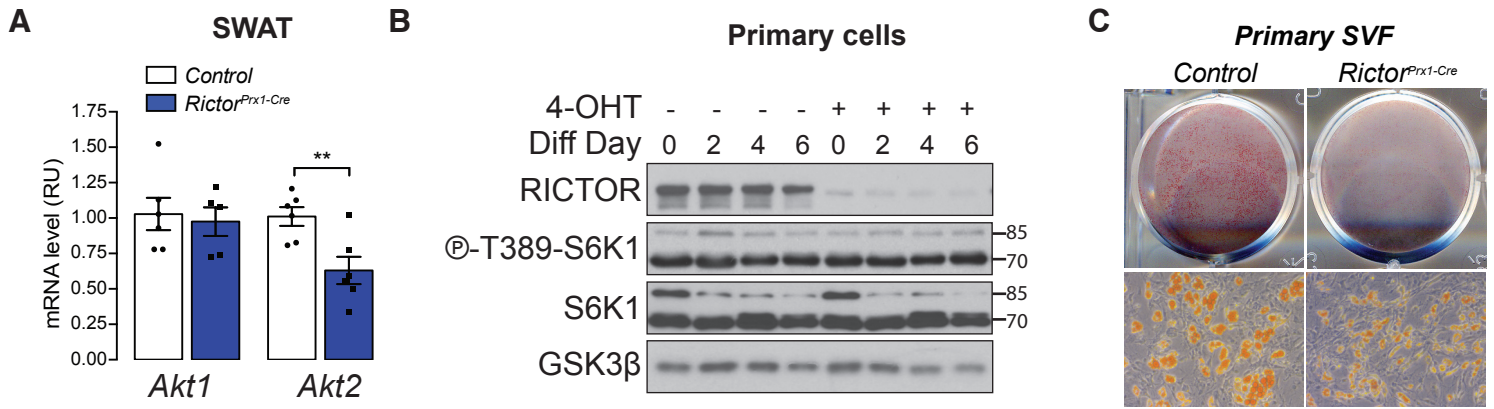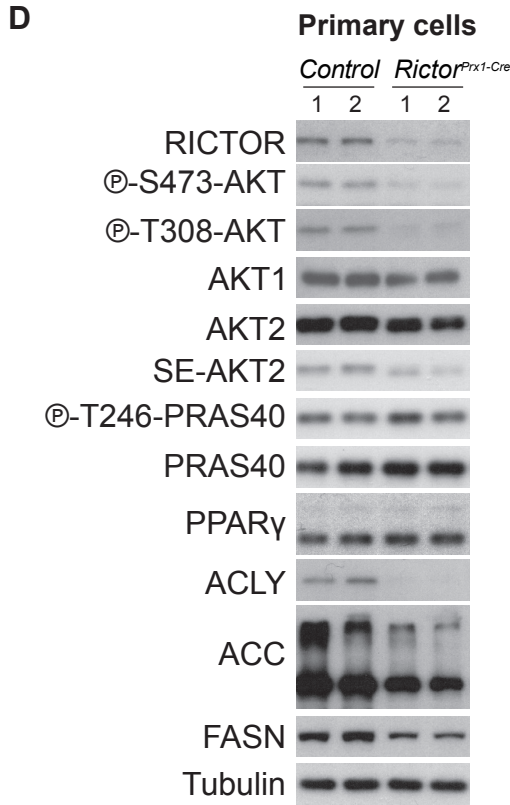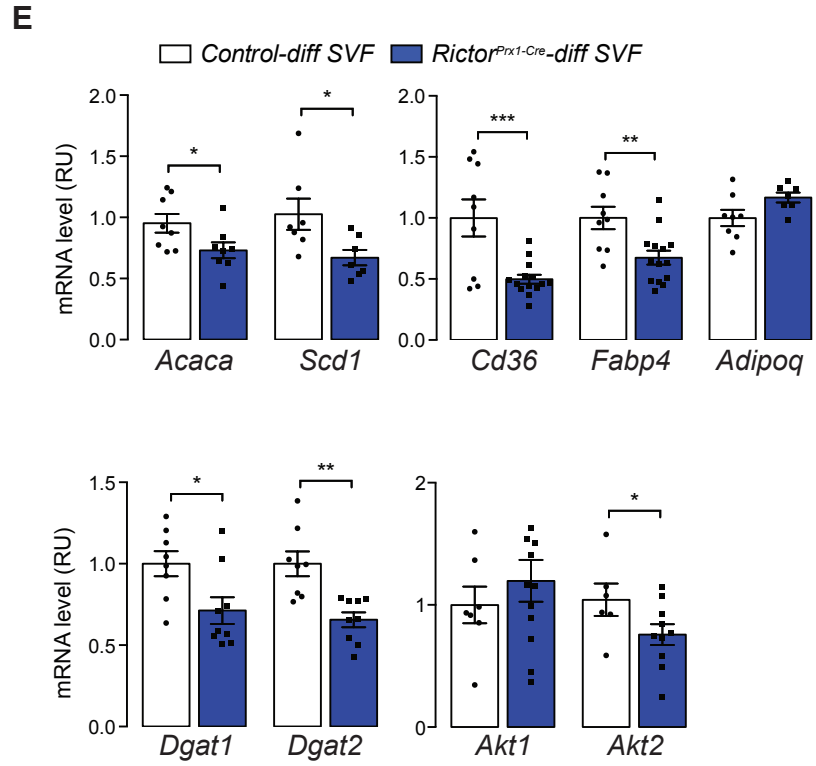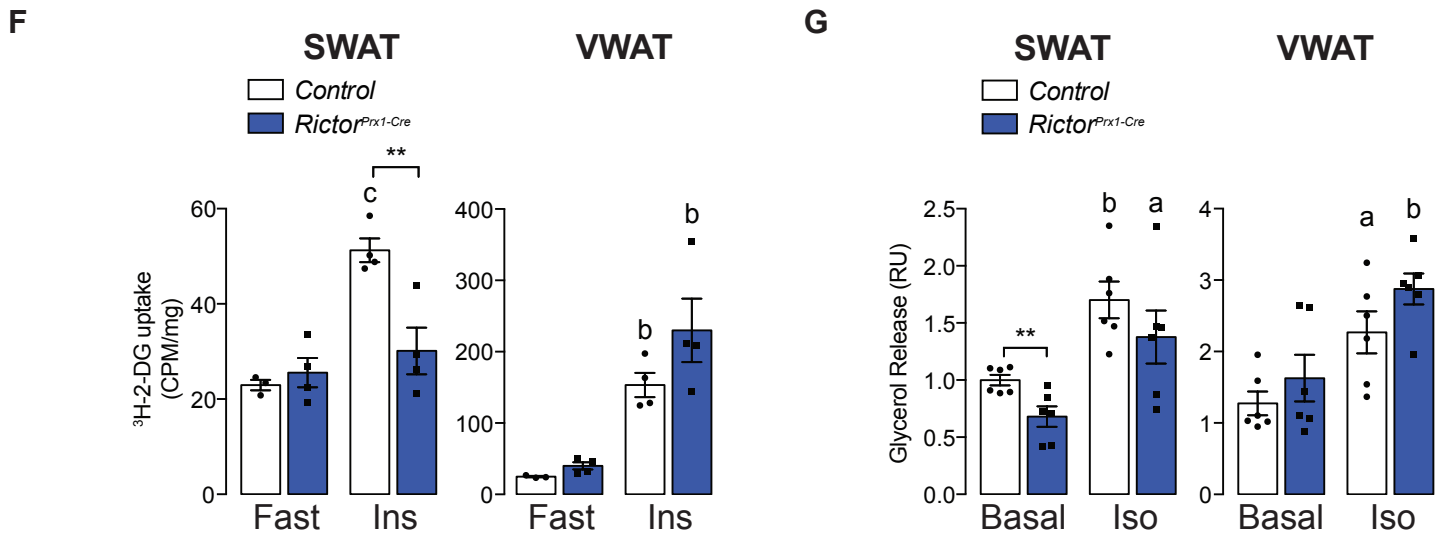

**Figure S7, related to Figure 7.**

**A** Relative mRNA expression by RT-PCR of *Akt* isoforms in SWAT from 8-week-old control and *Rictor<sup>Prx1-Cre</sup>* mice (N= 6-7; data represent mean  $\pm$  SEM; \*\*p < 0.01).

**B** Western blot of total and phospho-S6K1 in lysates from controls and *Rictor-iKO<sub>primary</sub>* cells at indicated time points during adipogenesis.

**C** Oil Red O (ORO) staining of differentiated primary preadipocytes isolated from control and *Rictor<sup>Prx1-Cre</sup>* mice.

**D** Western blot of lysates from differentiated primary preadipocytes isolated from control and *Rictor<sup>Prx1-Cre</sup>* mice. Each sample is from an individual mouse with the indicated genotype.

**E** Relative mRNA expression by RT-PCR of indicated genes from differentiated primary preadipocytes isolated from control and *Rictor<sup>Prx1-Cre</sup>* mice (N= 8; data represent mean  $\pm$  SEM; \*p < 0.05, \*\*p < 0.01, \*\*\*p < 0.001).

**F** <sup>3</sup>H-2-Deoxyglucose uptake (<sup>3</sup>H-2-DG) of SWAT and VWAT with or without insulin (ins) stimulation from control and *Rictor<sup>Prx1-Cre</sup>* mice. Data represent mean  $\pm$  SEM; \*\*p < 0.01. b: p < 0.01 while its fasted counterpart is compared; c: p < 0.001.

**G** Lipolytic function measured by glycerol release from SWAT and VWAT with or without isoproterenol (iso) stimulation from control and *Rictor<sup>Prx1-Cre</sup>* mice. Data represent mean  $\pm$  SEM; \*\*p < 0.01. a: p < 0.05 while its counterpart under basal condition is compared; b: p < 0.01.

**Table S1: Gene ontology biological processes and KEGG pathway enrichment analysis of *Rictor*-dependent genes, related to Figure 2.**

| <b>GO term Biology Processes</b>               |         |            |          |
|------------------------------------------------|---------|------------|----------|
| <i>Rictor-required (Down-regulatory) genes</i> |         |            |          |
| GO term                                        | GO #    | Gene count | FDR      |
| D2                                             |         |            |          |
| Cell adhesion                                  | 0007155 | 8          | 3.20E-02 |
| D8                                             |         |            |          |
| Lipid metabolic process                        | 0006629 | 22         | 9.80E-09 |
| Metabolic process                              | 0008152 | 19         | 4.90E-06 |
| Oxidation-reduction process                    | 0055114 | 21         | 6.10E-05 |
| Fatty acid metabolic process                   | 0006631 | 10         | 2.10E-03 |
| Triglyceride metabolic process                 | 0006641 | 6          | 1.10E-02 |
| Inflammatory response                          | 0006954 | 12         | 4.20E-02 |
| <i>Rictor-suppressed (Up-regulatory) genes</i> |         |            |          |
| GO term                                        | GO #    | Gene count | FDR      |
| D2                                             |         |            |          |
| Complement activation                          | 0006956 | 6          | 7.70E-06 |
| Immune system process                          | 0002376 | 11         | 1.50E-02 |
| <b>KEGG pathways</b>                           |         |            |          |
| <i>Rictor-required (Down-regulatory) genes</i> |         |            |          |
| Pathway                                        |         | Gene count | FDR      |
| D0                                             |         |            |          |
| ECM*-receptor interaction                      |         | 6          | 2.90E-03 |
| D2                                             |         |            |          |
| ECM-receptor interaction                       |         | 6          | 9.40E-04 |
| D8                                             |         |            |          |
| PPAR signaling pathway                         |         | 12         | 1.10E-07 |
| Fatty acid metabolism                          |         | 8          | 8.40E-05 |
| Metabolic pathways                             |         | 30         | 2.00E-03 |
| Propanoate metabolism                          |         | 5          | 7.10E-03 |
| Glycerolipid metabolism                        |         | 6          | 1.20E-02 |
| Fat digestion and absorption                   |         | 5          | 9.40E-04 |
| <i>Rictor-suppressed (Up-regulatory) genes</i> |         |            |          |
| Pathway                                        |         | Gene count | FDR      |
| D2                                             |         |            |          |
| Staphylococcus aureus infection                |         | 7          | 1.70E-04 |
| Complement and coagulation cascades            |         | 6          | 4.00E-02 |

\*ECM: extracellular matrix



**Table S2: Bone structure analysis, related to Figure 6.**

|                                | Male           |                                  |                 | Female         |                                  |                 |
|--------------------------------|----------------|----------------------------------|-----------------|----------------|----------------------------------|-----------------|
|                                | Control        | <i>Rictor<sup>Prx1-Cre</sup></i> | <i>P</i> -Value | Control        | <i>Rictor<sup>Prx1-Cre</sup></i> | <i>P</i> -Value |
| Tb thickness (mm)              | 0.0513±0.00584 | 0.04334±0.00496                  | 0.0396*         | 0.0407±0.00819 | 0.0397±0.00328                   | 0.782           |
| Tb spacing (mm)                | 0.246±0.0218   | 0.289±0.147                      | 0.500           | 0.362±0.0919   | 0.376±0.0603                     | 0.785           |
| Tb number (1/mm)               | 4.132±0.321    | 4.006±1.459                      | 0.840           | 2.975±0.829    | 2.721±0.364                      | 0.529           |
| BV/TV                          | 0.101±0.225    | 0.0986±0.0702                    | 0.938           | 0.037±0.0259   | 0.0275±0.0091                    | 0.421           |
| Cort thickness (mm)            | 0.185±0.00850  | 0.1426±0.0178                    | 0.00127**       | 0.171±0.00985  | 0.1315±0.00706                   | 0.00073***      |
| Cort/Total Area                | 0.529±0.00371  | 0.500±0.0335                     | 0.223           | 0.540±0.0517   | 0.501±0.0233                     | 0.134           |
| Marrow Area (mm <sup>2</sup> ) | 0.610±0.00985  | 0.505±0.0461                     | 0.0578          | 0.4133±0.0271  | 0.387±0.0399                     | 0.272           |

\*P <0.05; \*\*P<0.01; P<0.001

Tb: trabecular; BV: bone volume; TV: total volume; Cort: cortical.

**Table S3: Bone marrow analysis and osmium stain quantification, related to Figure 5.**

|       |                        | Male         |                                  |                 | Female        |                                  |                 |
|-------|------------------------|--------------|----------------------------------|-----------------|---------------|----------------------------------|-----------------|
|       |                        | Control      | <i>Rictor<sup>Prx1-Cre</sup></i> | <i>P</i> -Value | Control       | <i>Rictor<sup>Prx1-Cre</sup></i> | <i>P</i> -Value |
| Prox. | MV (mm <sup>3</sup> )  | 6.659±0.723  | 4.564±0.678                      | 0.00287**       | 3.895±0.437   | 3.59±0.409                       | 0.316           |
|       | MAT (mm <sup>3</sup> ) | 0.03465±0.04 | 0.0788±0.088                     | 0.405           | 0.0693±0.0673 | 0.0077±0.00816                   | 0.039*          |
| Dist. | MV (mm <sup>3</sup> )  | 1.429±0.0856 | 1.218±0.281                      | 0.196           | 1.184±0.222   | 1.104±0.110                      | 0.462           |
|       | MAT (mm <sup>3</sup> ) | 0.82±0.289   | 0.771±0.687                      | 0.876           | 0.789±0.377   | 0.579±0.239                      | 0.306           |

\*P <0.05; \*\*P<0.01.

Prox.: proximal; Dis.: distal; MV: marrow volume; MAT: marrow adipose tissue.

**Table S4: Primer sequences, related to the STAR Methods section.**

| RT-PCR (mouse)    |         |                            |
|-------------------|---------|----------------------------|
| Site              |         | Sequence (5'-3')           |
| <i>TBP</i>        | Forward | ACGGACAACACTGCGTTGATTTT    |
|                   | Reverse | ACTTAGCTGGGAAGCCCAAC       |
| <i>Pparg2</i>     | Forward | TGGCATCTCTGTGTCAACCATG     |
|                   | Reverse | GCATGGTGCCTTCGCTGA         |
| <i>Cebpa</i>      | Forward | CAAGAACAGCAACGAGTACCG      |
|                   | Reverse | GTCACTGGTCAACTCCAGCAC      |
| <i>Cebpb</i>      | Forward | TCGGGACTTGATGCAATCC        |
|                   | Reverse | AAACATCAACAACCCCGC         |
| <i>Cebpd</i>      | Forward | GCTTTGTGGTTGCTGTTGAA       |
|                   | Reverse | ATCGACTTCAGCGCCTACA        |
| <i>Akt1</i>       | Forward | CACGCTACTTCCTCCTCAAG       |
|                   | Reverse | CTCTGTCTTCATCAGCTGGC       |
| <i>Akt2</i>       | Forward | CCTCCATGTAGACTCTCCAG       |
|                   | Reverse | CCTCCATCATCTCAGATGTGG      |
| <i>Acly</i>       | Forward | CTCACACGGAAGCTCATCAA       |
|                   | Reverse | ACGCCCTCATAGACACCATC       |
| <i>Acaca</i>      | Forward | GGAGATGTACGCTGACCGAGAA     |
|                   | Reverse | ACCCGACGCATGGTTTTCA        |
| <i>Fasn</i>       | Forward | GCTGCGGAAACTTCAGGAAAT      |
|                   | Reverse | AGAGACGTGTCACTCCTGGACTT    |
| <i>Cd36</i>       | Forward | TGGCCTTACTTGGGATTGG        |
|                   | Reverse | CCAGTGTATATGGCTCATCCA      |
| <i>Fabp4</i>      | Forward | GATGCCTTTGTGGGAACCT        |
|                   | Reverse | CTGTCTGCTGCGGTGATTT        |
| <i>Lpl</i>        | Forward | GGCCAGATTCATCAACTGGAT      |
|                   | Reverse | GCTCCAAGGCTGTACCCTAAG      |
| <i>Glut4</i>      | Forward | GTGACTGGAACACTGGTCCTA      |
|                   | Reverse | CCAGCCAGTTGCATTGTAG        |
| <i>Scd1</i>       | Forward | CCCTGCGGATCTTCCTTATC       |
|                   | Reverse | TGTGTTTCTGAGAACTTGTGGTG    |
| <i>Dgat1</i>      | Forward | GAGGCCTCTCTGCCCTATG        |
|                   | Reverse | GCCCCTGGACAACACAGACT       |
| <i>Dgat2</i>      | Forward | CCGCAAAGGCTTTGTGAAG        |
|                   | Reverse | GGAATAAGTGGGAACCAGATCA     |
| <i>Hsl</i>        | Forward | CAGTGTGACCGCCAGTTC         |
|                   | Reverse | ACCTCAATCTCAGTGATGTTCC     |
| <i>Mcad</i>       | Forward | GCCAAGATCTATCAGATTTATGAAGG |
|                   | Reverse | AGCTATGATCAGCCTCTGAATTTGT  |
| <i>Perilipin1</i> | Forward | CTGTGTGCAATGCCTATGAGA      |
|                   | Reverse | CTGGAGGGTATTGAAGAGCCG      |
| <i>Adipoq</i>     | Forward | TGTTCTCTTAATCCTGCCCA       |
|                   | Reverse | CCAACCTGCACAAGTTCCCTT      |

|                   |         |                         |                          |
|-------------------|---------|-------------------------|--------------------------|
| <i>Chrebpa</i>    | Forward | CGACACTCACCCACCTCTTC    |                          |
|                   | Reverse | TTGTTTCAGCCGGATCTTGTC   |                          |
| <i>Chrebpb</i>    | Forward | TCTGCAGATCGCGTGGAG      |                          |
|                   | Reverse | CTTGTCCCGGCATAGCAAC     |                          |
| <i>Pkm2</i>       | Forward | TCGCATGCAGCACCTGATT     |                          |
|                   | Reverse | CCTCGAATAGCTGCAAGTGGTA  |                          |
| <i>Rictor</i>     | Forward | TCGATCTGACCCGAGAACCTT   |                          |
|                   | Reverse | GTTATTCAGATGGCCCAGCTTTT |                          |
| ChIP-qPCR primers |         |                         |                          |
| Site              |         | Sequence (5'→3')        | Reference                |
| Cd36-PPRE         | Forward | CCAACGGAAGTGAATTTGAGC   | (Lefterova et al., 2010) |
|                   | Reverse | TTGCTGCTACTCCAGCAT      |                          |
| Fabp4-PPRE        | Forward | AATGTCAGGCATCTGGGAAC    | (Lefterova et al., 2010) |
|                   | Reverse | GACAAAGGCAGAAATGCACA    |                          |
| H3K9ac-Cd36-PPRE  | Forward | GAGCCGCCCTTCTATACTT     | (Lefterova et al., 2010) |
|                   | Reverse | TGTTGGGACAGACCAATCAG    |                          |
| H3K9ac-Fabp4-PPRE | Forward | TTCTGACTCCTGGCCTGAAC    | (Lefterova et al., 2010) |
|                   | Reverse | TGCCCTCTCAGGTTTCATTT    |                          |
| Pkm2-PPRE         | Forward | GCAGCCAGCCTGTAAGGGCA    | (Panasyuk et al., 2012a) |
|                   | Reverse | GCGAAGACAGGAAAACAGTGGGT |                          |
| Insulin           | Forward | CTTCAGCCCAGTTGACCAAT    | N/A                      |
|                   | Reverse | AGGGAGGAGGAAAGCAGAAC    |                          |
| Chr. 15           | Forward | AGCGTGGCCTTGGCAGCAA     | (Zhang et al., 2012)     |
|                   | Reverse | TGCGATTGGCTTCCTCTCCCC   |                          |
